# Supplementary material for: Genome-wide identification and expression analysis of growth-regulating factors in Dendrobium officinale and Dendrobium chrysotoxum
Source: PeerJ. 2023 Dec 15;11:e16644. doi: 10.7717/peerj.16644 (PMC10726744; doi:10.7717/peerj.16644)
Supplement: Table S1 [file peerj-11-16644-s002.xlsx]

## Sheet: D. officinale
Table S1. The detailed information of the predicted three-dimensional (3D) proteins.
Gene Name	GRF Protein Name	QMEANDisCo Global	GMQE	Target/Template Identity	Oligo-State	Template	Templete Description
Dof000773	DoGRF1	0.86 ± 0.05	0.88	76.92	homo-dimer	2br9.1.A	14-3-3 PROTEIN EPSILON
Dof001775	DoGRF2	0.87 ± 0.05	0.77	76.39	homo-dimer	2br9.1.A	14-3-3 PROTEIN EPSILON
Dof007872	DoGRF3	0.84 ± 0.05	0.87	80.71	homo-dimer	5nwk.2.A	14-3-3 c-1 protein
Dof007881	DoGRF4	0.85 ± 0.05	0.85	66.52	homo-dimer	2br9.1.A	14-3-3 PROTEIN EPSILON
Dof011242	DoGRF5	0.86 ± 0.05	0.82	76.92	homo-dimer	2br9.1.A	14-3-3 PROTEIN EPSILON
Dof011962	DoGRF7	0.87 ± 0.05	0.85	76.92	homo-dimer	2br9.1.A	14-3-3 PROTEIN EPSILON
Dof014759	DoGRF8	0.87 ± 0.05	0.84	76.07	homo-dimer	2br9.1.A	14-3-3 PROTEIN EPSILON
Dof014810	DoGRF9	0.83 ± 0.05	0.72	77.35	homo-dimer	2br9.1.A	14-3-3 PROTEIN EPSILON
Dof021876	DoGRF13	0.84 ± 0.05	0.88	79.13	homo-dimer	5nwk.2.A	14-3-3 c-1 protein
Dof022251	DoGRF15	0.87 ± 0.05	0.85	77.25	homo-dimer	2br9.1.A	14-3-3 PROTEIN EPSILON
Dof023549	DoGRF18	0.76 ± 0.05	0.8	50.21	homo-dimer	5nwk.2.A	14-3-3 c-1 protein
Dof026766	DoGRF19	0.84 ± 0.05	0.82	69.1	homo-dimer	2br9.1.A	14-3-3 PROTEIN EPSILON

## Sheet: D. chrysotoxum
Table S1. The detailed information of the predicted three-dimensional (3D) proteins.
Gene Name	GRF Protein Name	QMEANDisCo Global	GMQE	Target/Template Identity	Oligo-State	Template	Templete Description
KAH0449449.1	DcGRF1	0.84 ± 0.05	0.79	78.63	homo-dimer	2br9.1.A	14-3-3 PROTEIN EPSILON
KAH0449492.1	DcGRF2	0.87 ± 0.05	0.83	76.82	homo-dimer	2br9.1.A	14-3-3 PROTEIN EPSILON
KAH0453121.1	DcGRF3	0.81 ± 0.05	0.61	66.52	homo-dimer	2br9.1.A	14-3-3 PROTEIN EPSILON
KAH0453427.1	DcGRF4	0.85 ± 0.05	0.88	80.31	homo-dimer	5nwk.2.A	14-3-3 c-1 protein
KAH0453534.1	DcGRF5	0.84 ± 0.05	0.79	69.66	homo-dimer	2br9.1.A	14-3-3 PROTEIN EPSILON
KAH0455781.1	DcGRF7	0.84 ± 0.05	0.87	76.28	homo-dimer	5nwk.2.A	14-3-3 c-1 protein
KAH0459817.1	DcGRF11	0.87 ± 0.05	0.85	77.25	homo-dimer	2br9.1.A	14-3-3 PROTEIN EPSILON
KAH0460481.1	DcGRF14	0.80 ± 0.05	0.77	70.04	homo-dimer	7xbq.1.A	Putative 14-3-3 protein
KAH0464062.1	DcGRF15	0.87 ± 0.05	0.84	76.07	homo-dimer	2br9.1.A	14-3-3 PROTEIN EPSILON
KAH0464557.1	DcGRF16	0.85 ± 0.05	0.81	77.35	homo-dimer	2br9.1.A	14-3-3 PROTEIN EPSILON
KAH0468224.1	DcGRF17	0.87 ± 0.05	0.85	76.92	homo-dimer	2br9.1.A	14-3-4 PROTEIN EPSILON
KAH0468498.1	DcGRF18	0.86 ± 0.05	0.82	76.92	homo-dimer	2br9.1.A	14-3-4 PROTEIN EPSILON
