# Supplementary material for: Genome-wide identification and expression analysis of growth-regulating factors in Dendrobium officinale and Dendrobium chrysotoxum
Source: PeerJ. 2023 Dec 15;11:e16644. doi: 10.7717/peerj.16644 (PMC10726744; doi:10.7717/peerj.16644)
Supplement: Table S2 — The raw data showed that four genes were up-regulated under Methyl-Jasmonic Acid/Methyl Jasmonate (MeJA) treatment, which means DoGRFs and DcGRFs play a crucial role in stress response. [file peerj-11-16644-s003.xlsx]

## Sheet: Sheet1
Table S2. Primer sequences for qRT-PCR.
Gene Name	Forward Primer Sequence (5'–3')	Reverse Primer Sequence (5'–3')
DoGRF1	ATGGCGTCGCAGAAAGATCG	CCTCCATCTTCTGCTATGTCCG
DoGRF2	ATGTCTCCTGTGGAGTCTTCTCG	GGGGTAACACATTTGGCTAAGTAAC
DoGRF3	AACCACGGCGAGGGAAGA	CATCACCCCCTTCATCCTGC
DoGRF4	CGCTGACTCGTGAGCAGTATG	CCTGAGCATCAGAAGTCCAGAG
DoGRF5	ATGGCGTCGCAGAAGGAGC	TCACTCTGCATCTTCGCCAGG
DoGRF7	ATGTCTCCTGCGGAGTATTCTCG	GGATTCTTTCATCTCATCCCCACC
DoGRF8	ATGTCATCAGCAGAGTCCTCGC	CCTGTTTAGGAGCGTCTTTGATCT
DoGRF9	ATGGCTTCGCAGAGAGACCG	TGCCCCCCTCTTTCCTTTCG
DoGRF13	ATGGCAGCCTCAACGAGAGAAC	TCTCATCAGCCCCTTCATCCTG
DoGRF15	ATGGCGGGAACCAGGGAAG	CTACTGCTCCTCGCGATTGGG
DcGRF1	ATGGCGTCGCAGAAAGATCGT	CACTCCATCTTCTGCTATGTCCG
DcGRF2	ATGTCACCTGTGGAGTCTTCTCG	CTAGGGCTCTCCAGATTCGCG
DcGRF3	GCATGACTCCTTTAAAGGAGTCACC	TCATCTATCTGATCCTGAGCATCGG
DcGRF4	CAACCACGGCGAGGGAAGAAAA	CATTATCAGGTTTTGAGGCCTCCT
DcGRF11	TGGCGGGAACCAGGGAGGA	CTACTGCTCCTCGCGATTGGG
DcGRF14	ATGGCAGCCTCAACGAGAGAG	CGTCTTCTTCATCATCTCGTCCA
DcGRF15	ATGTCATCAGCAGAGTCCTCGC	CCTGTTTAGGAGCGTCTTTGATCT
DcGRF16	ATGGCTTCGCAAAGAGAACGC	TGAATGCCCCCCTCTTTCCTTTC
DcGRF17	ATGTCTCCTGCGGAGTATTCTCG	GGATTCTTTCATCTCATCCCCACC
DcGRF18	ATGGCGTCGCAGAAGGAGC	CACTCTGCATCTTCACCAGGC
