# Supplementary material for: Genome-wide identification and expression analysis of growth-regulating factors in Dendrobium officinale and Dendrobium chrysotoxum
Source: PeerJ. 2023 Dec 15;11:e16644. doi: 10.7717/peerj.16644 (PMC10726744; doi:10.7717/peerj.16644)
Supplement: Table S3 [file peerj-11-16644-s004.xlsx]

## Sheet: Sheet1
Table S3. The original value of qRT-PCR.
Gene Name	CK1	CK2	CK3	Average		T1	T2	T3	Average
DoGRF1	234.24	206.36	211.21	217.27		175.76	176.99	185.34	179.363
DoGRF2	285.95	301.68	302.11	296.58		212.37	244.84	202.14	219.783
DoGRF3	141.3	184.25	175.77	167.107		170.54	183.92	173.63	176.03
DoGRF4	756.38	760.5	797.25	771.377		852.56	841.12	890.13	861.27
DoGRF5	215.74	240.15	219.42	225.103		241.54	258.16	235.25	244.983
DoGRF7	280.73	294.72	303.91	293.12		238.83	245.89	235.87	240.197
DoGRF8	502.24	507.04	505.72	505		362.08	375.28	364.56	367.307
DoGRF9	39.37	39.61	34.11	37.6967		21.27	23.96	22.26	22.4967
DoGRF13	156.97	183.36	179.02	173.117		173.49	173.11	167.22	171.273
DoGRF15	122.77	136.36	146.75	135.293		189.81	183.09	181.17	184.69
DcGRF1	194.57	216.24	203.27	204.693		177.36	187.7	168.91	177.99
DcGRF2	302.98	287.12	318.94	303.013		251.32	233.17	250.03	244.84
DcGRF3	773.2	752.73	751.57	759.167		840.76	846.6	835.1	840.82
DcGRF4	188.32	190.46	170.97	183.25		173.73	190.4	183.63	182.587
DcGRF11	147.26	129.33	136.49	137.693		183.99	174.11	186.17	181.423
DcGRF14	189.6	178.77	182.71	183.693		169.59	176.6	177.14	174.443
DcGRF15	531.59	499.16	495.37	508.707		377.24	385.89	365.71	376.28
DcGRF16	36.87	43.66	36.3	38.9433		27.12	34.7	14.06	25.2933
DcGRF17	297.21	310.2	282.75	296.72		254.69	242.36	239.62	245.557
DcGRF18	244.17	239.7	233.58	239.15		261.23	252.19	262.06	258.493
