# Supplementary material for: Genome-wide identification and expression analysis of growth-regulating factors in Dendrobium officinale and Dendrobium chrysotoxum
Source: PeerJ. 2023 Dec 15;11:e16644. doi: 10.7717/peerj.16644 (PMC10726744; doi:10.7717/peerj.16644)
Supplement: Table S4 [file peerj-11-16644-s005.xlsx]

## Sheet: Sheet 1
Table S4. MIQE checklist
Item to check	Importance
Experimental design
Definition of experimental and control groups	E	D. officinale and D. chrysotoxum seedlings treated with 100μM MeJA were used as the treatment group, and the seedlings with normal growth were used as the control group.
Number within each group	E	3
Sample
Description	E	Well-growing rooting stage tissue of D. officinale and D. chrysotoxum.
Microdissection or macrodissection	E	Macrodissection
Processing procedure	E	After treated with 100μM MeJA, the D. officinale and D. chrysotoxum seedlings were removed from the culture bottle, washed with water 2-3 times, and then absorbed with absorbent paper, and frozen in liquid nitrogen, and stored in an ultra-low temperature refrigerator at -80℃ for use.
If frozen, how and how quickly?	E	Frozen in liquid nitrogen.
If fixed, with what and how quickly?	E	No Fixed.
Sample storage conditions and duration (especially for FFPEb samples)	E	Stored in an ultra-low temperature refrigerator at -80℃ for use.
Nucleic acid extraction
Procedure and/or instrumentation	E	The extracted materials of RNA were reverse-transcripted by PrimeScript 1-strand cDNA synthesis kit (TaKaRa).
Name of kit and details of any modifications	E	No modifications.
Details of DNase or RNase treatment	E	No Dnase and Rnase.
Contamination assessment (DNA or RNA)	E	A260/A280=1.8~2.0 using ultramicrospectrophotometer.
Nucleic acid quantification	E	The quantification of nucleic acid were using ultramicrospectrophotometer.
Instrument and method	E	Ultramicrospectrophotometer
RNA integrity: method/instrument	E	Agarose Gel Electrophoresis
RIN/RQI or Cq of 3' and 5' transcripts	E	No RIN/RQI or Cq of 3' and 5'_x0002_transcripts.
Inhibition testing (Cq dilutions, spike, or other)	E	No inhibition testing.
Reverse transcription
Complete reaction conditions	E	Incubate at 42℃ for 40min, and heat at 85℃ for 5min.
Amount of RNA and reaction volume	E	A total volume of 20 μL, including 4μL total RNA.
Priming oligonucleotide (if using GSP) and concentration	E	1 μL (10 μM)
Reverse transcriptase and concentration	E	1 μL (10 μM)
Temperature and time	E	Incubate at 42℃ for 40min, and heat at 85℃ for 5min.
qPCR target information
Gene symbol	E	GRF
Sequence accession number	E	See Table 1-2 and Supplementary Table 2 for details.
Amplicon length	E	250-350 bp
In silico specificity screen (BLAST, and so on)	E	BLAST
Location of each primer by exon or intron (if applicable)	E	Exon
What splice variants are targeted?	E	Gene
qPCR oligonucleotides
Primer sequences	E	See Supplementary Table 2 for details.
Location and identity of any modifications	E	No modifications.
qPCR protocol
Complete reaction conditions	E	The reaction conditions were predenaturation at 95℃ for 30s, 40 cycles (95℃ 5 s, 60℃ 30s), and dissolution curve (95℃ 15 s, 60℃ 60 s, 95℃ 15 s).
Reaction volume and amount of cDNA/DNA	E	Each reaction had a total volume of 20 μL, including SYBR Green Ⅰ fluorescent dye 10 μL, primer (10 μM) 0.4 μL, cDNA 2 μL and ddH2O 7.2 μL.
Primer, (probe), Mg2+, and dNTP concentrations	E	Each reaction had a total volume of 20 μL, including SYBR Green Ⅰ fluorescent dye 10 μL, primer (10 μM) 0.4 μL, cDNA 2 μL and ddH2O 7.2 μL.
Polymerase identity and concentration	E	Each reaction had a total volume of 20 μL, including SYBR Green Ⅰ fluorescent dye 10 μL, primer (10 μM) 0.4 μL, cDNA 2 μL and ddH2O 7.2 μL.
Buffer/kit identity and manufacturer	E	Takara
Additives (SYBR Green I, DMSO, and so forth)	E	SYBR Green I
Complete thermocycling parameters	E	The reaction conditions were predenaturation at 95℃ for 30s, 40 cycles (95℃ 5 s, 60℃ 30s), and dissolution curve (95℃ 15 s, 60℃ 60 s, 95℃ 15 s).
Manufacturer of qPCR instrument	E	LightCycler 96 from Roche.
qPCR validation
Specificity (gel, sequence, melt, or digest)	E	No specificity.
For SYBR Green I, Cq of the NTC	E	No Cq value of NTC and SYBR Green I.
Calibration curves with slope and y intercept	E	No calibration curves was calculated.
PCR efficiency calculated from slope	E	PCR efficiency was not calculated.
r 2 of calibration curve	E	No calibration curves was calculated.
Linear dynamic range	E	No linear dynamic range was calculated.
Cq variation at LOD	E	No LOD value was calculated.
Evidence for LOD	E	No LOD value was calculated.
If multiplex, efficiency and LOD of each assay	E	No LOD value was calculated.
Data analysis
qPCR analysis program (source, version)	E	LightCycler 96 SW 1.1
Method of Cq determination	E	Determinated by LightCycler 96 SW 1.1.
Outlier identification and disposition	E	Deleted.
Results for NTCs	E	Negative, no amplification.
Justification of number and choice of reference genes	E	GAPDH (F: TTCGGAAGGATTGGAAGGCTTGTAG, R: GAGATGATAACCTTCTTGGCACCGC)
Description of normalization method	E	The expression data were calculated by the 2-∆∆CT
Number and stage (reverse transcription or qPCR) of technical replicates	E	3
Repeatability (intraassay variation)	E	Repeatable
Statistical methods for results significance	E	Data were subjected to one-way analysis of variance (ANOVA), followed by Tukey’s test using SPSS 26.0 software (P<0.05).
Software (source, version)	E	SPSS (version 26.0; IBM SPSS Statistics, Armonk, NY, USA).
