# Supplementary material for: Genome-wide identification and expression analysis of growth-regulating factors in Dendrobium officinale and Dendrobium chrysotoxum
Source: PeerJ. 2023 Dec 15;11:e16644. doi: 10.7717/peerj.16644 (PMC10726744; doi:10.7717/peerj.16644)
Supplement: Table S5 — Synonymous (Ks) and non-synonymous (Ka) substitution rates of duplicate gene pairs (Ka/Ks ratios). [file peerj-11-16644-s006.xlsx]

## Sheet: Sheet1
Table S5. Ka, Ks and Ka/Ks values for duplication gene pairs in C. ensifolium, P. equestris and A. thaliana.
Species	Seq_1	Seq_2	Ka	Ks	Ka/Ks	Duplication type
Cymbidium ensifolium	JL005743	JL013921	0.0379924	0.913179	0.0416046	Segmental duplication
	JL005743	JL002588	0.0657131	1.27761	0.0514345	Segmental duplication
	JL023057	JL007931	0.107738	3.79565	0.0283845	Segmental duplication
	JL018984	JL002823	0.104279	0.2113	0.493514	Segmental duplication
	JL013921	JL002588	0.0499452	1.72952	0.028878	Segmental duplication
Phalaenopsis equestris	rna-XM_020721098.1	rna-XM_020737787.1	0.0597112	1.11338	0.0536308	Segmental duplication
	rna-XM_020721098.1	rna-XM_020726532.1	0.0839589	4.10377	0.020459	Segmental duplication
	rna-XM_020726532.1	rna-XM_020737787.1	0.103907	3.99612	0.026002	Segmental duplication
	rna-XM_020728866.1	rna-XM_020729952.1	0.0378133	0.678596	0.0557228	Segmental duplication
	rna-XM_020728866.1	rna-XM_020730405.1	0.06682	1.13739	0.0587484	Segmental duplication
	rna-XM_020729952.1	rna-XM_020730405.1	0.0418667	1.4314	0.0292487	Segmental duplication
Arabidopsis thaliana	AT3G02520.1	AT5G16050.1	0.0433168	0.854739	0.0506784	Segmental duplication
	AT3G02520.1	AT5G38480.1	0.062214	2.23736	0.0278069	Segmental duplication
	AT5G65430.3	AT5G10450.4	0.0519433	0.749033	0.0693471	Tandem duplication
	AT5G16050.1	AT5G38480.1	0.0631831	1.63702	0.0385965	Tandem duplication
	AT4G09000.2	AT1G35160.2	0.0807497	0.773241	0.10443	Segmental duplication
	AT4G09000.2	AT1G78300.1	0.101665	1.66228	0.0611599	Segmental duplication
	AT1G35160.2	AT1G78300.1	0.103125	1.90608	0.0541032	Tandem duplication
Synonymous (Ks) and non-synonymous (Ka) substitution rates of duplicate gene pairs (Ka/Ks ratios).
